# Supplementary material for: Preventive Care Needs of the North Carolina Medicaid Expansion Population
Source: PubMed Central journal article supplement — AJPM Focus. 2024 Oct 18;4(1):100289. doi: 10.1016/j.focus.2024.100289 (PMC11613178; doi:10.1016/j.focus.2024.100289), 2024-10-18
Supplement: mmc1.pdf [file mmc1.pdf]

## Supplemental Materials

Supplemental Table 1: Healthy People 2030 Goals for Included Measures

Supplemental Table 2: Sociodemographic Characteristics of the North Carolina Population 2016-2022

Supplemental Table 3: Sociodemographic Characteristics of the Traditional Medicaid Population, 2016-2022

Supplemental Table 4: Health Care Access by Year and Group

Supplemental Table 1: Health People 2030 Goals for Included Measures

| <b>Topic</b>         | <b>Measure</b>                                                                                                             | <b>Desired Direction</b> | <b>2030 Goal</b> |
|----------------------|----------------------------------------------------------------------------------------------------------------------------|--------------------------|------------------|
| Usual Care           | Proportion of adults 18+ who report having a regular care provider                                                         | Increase                 | 84.0%            |
| Dental Visit         | Proportion with any oral health care in the past year                                                                      | Increase                 | 45.0%            |
| Seasonal Flu Vaccine | Proportion reporting a seasonal flu vaccine in the past year                                                               | Increase                 | 70.0%            |
| Colorectal Cancer    | Proportion of adults aged 45 to 75 who received a colorectal cancer screening based on most recent guidelines <sup>1</sup> | Increase                 | 68.3%            |
| Cervical Cancer      | Proportion of women 21 to 65 who received a cervical cancer screening based on most recent guidelines                      | Increase                 | 79.2%            |
| Breast Cancer        | Proportion of women 50 to 74 who received a breast cancer screening based on most recent guidelines                        | Increase                 | 80.3%            |
| Cost                 | Percentage of adults 18+ who were delayed in receiving medical care due to cost                                            | Decrease                 | 8.5%             |
| Smoking              | Percentage of adults 18+ who smoke all days or some days                                                                   | Decrease                 | 17.4%            |
| Binge Drinking       | Percentage of adults 21+ who engaged in binge drinking in the past month                                                   | Decrease                 | 25.4%            |

Measurement definitions and Healthy People 2030 targets that align with included measures of care access; our analysis includes those 18 to 64 for all measures except cancer screening, which restrict to those age-appropriate for screening and under 64 years of age (<https://health.gov/healthypeople>)

<sup>1</sup>In most included years of data, colorectal cancer screening is only recommended to those 50-74 (our analysis includes those 50 to 64); we examine 45 to 64 as a sensitivity analysis in 2022.

<sup>2</sup> Lung cancer screening was only measured in 2022; we examine the most updated USPSTF inclusion criteria which include those 50 and a 20-pack year smoking history.

*Supplemental Table 2: Sociodemographic Characteristics of the North Carolina Population*

| <b>Categories</b>                      | <b>2016</b>      | <b>2018</b>      | <b>2020</b>      | <b>2022</b>      | <b>P value</b> |
|----------------------------------------|------------------|------------------|------------------|------------------|----------------|
| <b>Total</b>                           | <b>4563</b>      | <b>3260</b>      | <b>3951</b>      | <b>3231</b>      |                |
| <b>Estimated Pop</b>                   | <b>6,204,879</b> | <b>6,309,762</b> | <b>6,278,667</b> | <b>6,318,595</b> |                |
| <b>Age</b>                             |                  |                  |                  |                  |                |
| 18 to 24                               | 15.9% (466)      | 16.1% (376)      | 15.5% (391)      | 18.3% (422)      |                |
| 25 to 34                               | 21.0% (859)      | 21.0% (621)      | 21.4% (757)      | 21.5% (658)      |                |
| 35 to 44                               | 20.6% (886)      | 20.3% (627)      | 20.6% (789)      | 20.0% (658)      |                |
| 45 to 54                               | 21.7% (1075)     | 21.5% (804)      | 20.9% (981)      | 18.9% (705)      |                |
| 55 to 64                               | 20.8% (1277)     | 21.2% (832)      | 21.6% (1033)     | 21.2% (788)      | <.001          |
| <b>Sex</b>                             |                  |                  |                  |                  |                |
| Male                                   | 49.1% (2158)     | 48.7% (1551)     | 49.4% (1864)     | 48.6% (1549)     |                |
| Female                                 | 50.9% (2404)     | 51.2% (1703)     | 50.6% (2087)     | 51.4% (1682)     |                |
| Missing                                | 0 (-)            | 0.1% (6)         | 0 (-)            | 0 (-)            | 0.007          |
| <b>Hispanic Ethnicity</b>              |                  |                  |                  |                  |                |
| Hispanic                               | 9.2% (438)       | 9.6% (353)       | 10.2% (495)      | 11.5% (418)      |                |
| Non-Hispanic                           | 90.3% (4101)     | 89.7% (2886)     | 89.3% (3434)     | 87.9% (2794)     |                |
| Missing                                | 0.5% (24)        | 0.7% (21)        | 0.5% (22)        | 0.6% (19)        | <.001          |
| <b>Race</b>                            |                  |                  |                  |                  |                |
| White Only                             | 66.5% (3012)     | 64.2% (2116)     | 63.3% (2517)     | 61.8% (2056)     |                |
| Black/<br>African American Only        | 22.1% (990)      | 22.6% (683)      | 22.3% (771)      | 21.6% (612)      |                |
| American Indian/Alaskan<br>Native Only | 1.6% (104)       | 2.0% (82)        | 1.5% (128)       | 1.3% (136)       |                |
| Asian Only                             | 3.2% (87)        | 1.9% (50)        | 3.4% (81)        | 3.5% (78)        |                |
| Native Hawaiian/Pacific<br>Islander    | 0.2% (11)        | 0.2% (6)         | 0.2% (9)         | 1% (22)          |                |
| Other/Multirace/Missing                | 6.4% (359)       | 9.2% (323)       | 9.4% (445)       | 10.8% (327)      | <.001          |

| Categories                  | 2016         | 2018         | 2020         | 2022         | P value |
|-----------------------------|--------------|--------------|--------------|--------------|---------|
| <b>Marital Status</b>       |              |              |              |              |         |
| Married/Long-term Partnered | 54.3% (2470) | 54.5% (1694) | 54.5% (2229) | 54.9% (1815) |         |
| Divorce/Widowed/Separated   | 16.6% (931)  | 16.4% (698)  | 16.3% (743)  | 15.0% (557)  |         |
| Never Married               | 28.7% (1142) | 28.6% (856)  | 28.7% (954)  | 29.3% (830)  |         |
| Missing                     | 0.4% (20)    | 0.4% (12)    | 0.6% (25)    | 0.9% (29)    | <.001   |
| <b>Education</b>            |              |              |              |              |         |
| Less than High School       | 13.7% (473)  | 12.0% (339)  | 11.5% (354)  | 11.2% (272)  |         |
| High School/GED             | 26.2% (1207) | 25.9% (802)  | 26.4% (994)  | 26.2% (708)  |         |
| Some College                | 33.5% (1344) | 33.3% (922)  | 32.8% (1087) | 33.1% (931)  |         |
| College+                    | 26.4% (1530) | 28.7% (1193) | 29.0% (1503) | 29.2% (1308) |         |
| Missing                     | 0.2% (9)     | 0.1% (4)     | 0.3% (13)    | 0.3% (12)    | <.001   |
| <b>Employment</b>           |              |              |              |              |         |
| Employed                    | 66.6% (3046) | 69.3% (2215) | 68.1% (2721) | 69.8% (2338) |         |
| Out of Work                 | 5.7% (252)   | 4.7% (150)   | 8.5% (316)   | 5.6% (161)   |         |
| Homemaker                   | 5.2% (214)   | 5.2% (159)   | 5.1% (199)   | 5.5% (152)   |         |
| Student                     | 7.8% (249)   | 6.7% (166)   | 5.8% (142)   | 4.6% (105)   |         |
| Retired                     | 4.7% (289)   | 5.2% (209)   | 4.3% (225)   | 5.6% (202)   |         |
| Unable to Work              | 9.6% (493)   | 8.2% (334)   | 7.3% (318)   | 8.1% (248)   |         |
| Missing                     | 0.4% (20)    | 0.7% (27)    | 0.9% (30)    | 0.9% (25)    | <.001   |
| <b>Children</b>             |              |              |              |              |         |
| No Children                 | 60.6% (2919) | 60.2% (2059) | 56.2% (2307) | 59.6% (1949) |         |
| One Child                   | 16.3% (688)  | 17.0% (516)  | 19.8% (720)  | 16.7% (524)  |         |
| Two Children                | 14.6% (595)  | 14.5% (439)  | 15.0% (569)  | 14.8% (475)  |         |
| Three or More Children      | 8.5% (361)   | 8.2% (246)   | 8.9% (355)   | 8.9% (283)   | <.001   |
| <b>Health Status</b>        |              |              |              |              |         |
| Poor/Fair/Good              | 47.3% (2233) | 48.4% (1598) | 40.3% (1608) | 45.1% (1451) |         |
| Excellent/Very Good         | 52.5% (2318) | 51.3% (1652) | 59.5% (2336) | 54.5% (1765) |         |
| Missing                     | 0.3% (12)    | 0.3% (10)    | 0.2% (7)     | 0.4% (15)    | <.001   |

| Categories                    | 2016         | 2018         | 2020         | 2022         | P value |
|-------------------------------|--------------|--------------|--------------|--------------|---------|
| <b>Chronic Conditions</b>     |              |              |              |              |         |
| Zero                          | 53.1% (2261) | 50.4% (1590) | 51.9% (1988) | 50.4% (1528) |         |
| One                           | 25.4% (1162) | 26.7% (834)  | 27.1% (1051) | 26.1% (887)  |         |
| Two or More                   | 19.4% (1038) | 21.0% (758)  | 18.8% (821)  | 20.6% (724)  |         |
| Missing                       | 2.1% (102)   | 1.9% (78)    | 2.3% (91)    | 3.0% (92)    | 0.06    |
| <b>Functional Disability</b>  |              |              |              |              |         |
| Yes                           | 21.5% (1097) | 24.3% (841)  | 21.9% (887)  | 28.1% (863)  |         |
| No                            | 76.4% (3378) | 73.6% (2360) | 75.7% (2980) | 70.0% (2314) |         |
| Missing                       | 2.1% (88)    | 2.2% (59)    | 2.4% (84)    | 1.9% (54)    | 0.001   |
| <b>Income</b>                 |              |              |              |              |         |
| <99%                          | 15.3% (684)  | 12.2% (414)  | 13.4% (532)  | 11.9% (384)  |         |
| 100-138%FPL                   | 7.5% (344)   | 8.5% (303)   | 10.2% (407)  | 6.8% (206)   |         |
| 139-199%FPL                   | 12.5% (598)  | 9.2% (325)   | 8.8% (345)   | 8.3% (238)   |         |
| 200+FPL                       | 47.6% (2208) | 51.8% (1647) | 48.2% (1944) | 48.9% (1711) |         |
| Missing                       | 17.1% (729)  | 18.4% (571)  | 19.4% (723)  | 24.1% (692)  | <.001   |
| <b>Insurance</b>              |              |              |              |              |         |
| Uninsured                     | 17.4% (764)  | 18.2% (611)  | 18.6% (736)  | 12.2% (401)  |         |
| Medicaid                      | 4.8% (233)   | 5.0% (163)   | 5.1% (178)   | 7.3% (194)   |         |
| Other                         | 77.3% (3551) | 76.4% (2478) | 75.8% (3023) | 78.1% (2572) |         |
| Missing                       | 0.5% (15)    | 0.4% (8)     | 0.5% (14)    | 2.5% (64)    | <.001   |
| <b>CC Screen Eligible</b>     |              |              |              |              |         |
| Yes                           | 45.3% (2227) | 46.4% (1589) | 46.1% (1950) | 45.1% (1556) |         |
| <b>BC Screening Eligible</b>  |              |              |              |              |         |
| Yes                           | 16.6% (983)  | 16.1% (650)  | 16.9% (853)  | 16.3% (615)  |         |
| <b>CRC Screening Eligible</b> |              |              |              |              |         |
| Yes                           | 29.8% (1701) | 29.6% (1141) | 30.5% (1445) | 37.8% (1424) |         |

*Supplemental Table 3: Sociodemographic Characteristics of the Traditional Medicaid Population, 2016-2022*

| <b>Categories</b>                      | <b>2016</b>    | <b>2018</b>    | <b>2020</b>    | <b>2022</b>    | <b>P value</b> |
|----------------------------------------|----------------|----------------|----------------|----------------|----------------|
| <b>Total</b>                           | <b>233</b>     | <b>163</b>     | <b>178</b>     | <b>194</b>     |                |
| <b>Estimated Pop</b>                   | <b>299,424</b> | <b>317,920</b> | <b>318,002</b> | <b>459,814</b> |                |
| <b>Age</b>                             |                |                |                |                |                |
| 18 to 24                               | 22.5% (30)     | 25.2% (23)     | 24.9% (27)     | 26.5% (36)     |                |
| 25 to 34                               | 23.6% (50)     | 24.9% (34)     | 34.2% (53)     | 29.1% (49)     |                |
| 35 to 44                               | 19.4% (47)     | 15.9% (28)     | 12.5% (29)     | 20.3% (44)     |                |
| 45 to 54                               | 18.3% (50)     | 18.9% (41)     | 12.2% (30)     | 10.5% (32)     |                |
| 55 to 64                               | 16.1% (56)     | 15% (37)       | 16.2% (39)     | 13.5% (33)     | 0.2            |
| <b>Sex</b>                             |                |                |                |                |                |
| Male                                   | 28.1% (65)     | 29.5% (46)     | 26.1% (39)     | 27.2% (55)     |                |
| Female                                 | 71.9% (168)    | 70.5% (117)    | 73.9% (139)    | 72.8% (139)    |                |
| Missing                                | 0 (-)          | 0 (-)          | 0 (-)          | 0 (-)          | 0.44           |
| <b>Hispanic Ethnicity</b>              |                |                |                |                |                |
| Hispanic                               | 4.6% (11)      | 1.9% (4)       | 6.5% (16)      | 11.6% (20)     |                |
| Non-Hispanic                           | 95.3% (221)    | 96.8% (157)    | 93.5% (162)    | 88.4% (174)    |                |
| Missing                                | 0.1% (1)       | 1.4% (2)       | 0 (-)          | 0 (-)          | 0.01           |
| <b>Race</b>                            |                |                |                |                |                |
| White Only                             | 48.5% (109)    | 47.3% (80)     | 45.5% (80)     | 42.8% (86)     |                |
| Black/<br>African American Only        | 40.5% (92)     | 38.6% (58)     | 47.8% (74)     | 34.2% (66)     |                |
| American Indian/Alaskan<br>Native Only | 4.9% (16)      | 4.2% (11)      | 3% (12)        | 2.9% (19)      |                |
| Asian Only                             | 0 (-)          | 0.7% (1)       | 0.1% (1)       | 0 (-)          |                |
| Native Hawaiian/Pacific<br>Islander    | 0.1% (1)       | 0 (-)          | 0 (-)          | 1.5% (1)       |                |
| Other/Multirace/Missing                | 6% (15)        | 9.2% (13)      | 3.6% (11)      | 18.6% (22)     | 0.65           |
| <b>Marital Status</b>                  |                |                |                |                |                |

| <b>Categories</b>           | <b>2016</b> | <b>2018</b> | <b>2020</b> | <b>2022</b> | <b>P value</b> |
|-----------------------------|-------------|-------------|-------------|-------------|----------------|
| Married/Long-term Partnered | 28.2% (55)  | 24.8% (36)  | 19.6% (40)  | 29.7% (52)  |                |
| Divorce/Widowed/Separated   | 28.5% (85)  | 30.0% (61)  | 27.6% (62)  | 22.2% (58)  |                |
| Never Married               | 43.3% (93)  | 45.0% (65)  | 52.8% (76)  | 48.0% (83)  |                |
| Missing                     | 0 (-)       | 0.2% (1)    | 0 (-)       | 0 (-)       | 0.78           |
| <b>Education</b>            |             |             |             |             |                |
| Less than High School       | 28% (61)    | 24.0% (33)  | 23.8% (29)  | 25.1% (36)  |                |
| High School/GED             | 38% (89)    | 42.5% (67)  | 43.4% (82)  | 42.0% (81)  |                |
| Some College                | 30.3% (69)  | 27.5% (45)  | 29.4% (55)  | 26.3% (54)  |                |
| College+                    | 3.7% (14)   | 6.0% (18)   | 3.3% (11)   | 6.6% (23)   |                |
| Missing                     | 0 (-)       | 0 (-)       | 0.2% (1)    | 0 (-)       | 0.14           |
| <b>Employment</b>           |             |             |             |             |                |
| Employed                    | 30.9% (63)  | 34.6% (47)  | 29.9% (55)  | 39.3% (83)  |                |
| Out of Work                 | 13.1% (27)  | 7.8% (13)   | 21.6% (33)  | 14.6% (25)  |                |
| Homemaker                   | 3.1% (10)   | 10.7% (15)  | 10% (16)    | 12.3% (18)  |                |
| Student                     | 10.2% (15)  | 8.5% (10)   | 8.2% (8)    | 8.2% (10)   |                |
| Retired                     | 2.5% (6)    | 2.6% (3)    | 1.6% (5)    | 1.3% (4)    |                |
| Unable to Work              | 40.1% (112) | 34.3% (74)  | 28.8% (61)  | 24.3% (53)  |                |
| Missing                     | 0 (-)       | 1.5% (1)    | 0 (-)       | 0 (-)       | 0.002          |
| <b>Children</b>             |             |             |             |             |                |
| No Children                 | 47.4% (124) | 51.5% (95)  | 34.5% (65)  | 42.8% (72)  |                |
| One Child                   | 24.3% (48)  | 17.2% (24)  | 23.1% (45)  | 23.5% (51)  |                |
| Two Children                | 15.5% (30)  | 16.3% (25)  | 20.3% (34)  | 15.6% (37)  |                |
| Three or More Children      | 12.8% (31)  | 15% (19)    | 22.1% (34)  | 18.1% (34)  | <.001          |
| <b>Health Status</b>        |             |             |             |             |                |
| Poor/Fair/Good              | 65.3% (164) | 74.8% (131) | 59.4% (119) | 56.2% (123) |                |
| Excellent/Very Good         | 33.6% (67)  | 24.6% (31)  | 40.6% (59)  | 43.1% (69)  |                |
| Missing                     | 1.1% (2)    | 0.6% (1)    | 0 (-)       | 0.7% (2)    | 0.02           |
| <b>Chronic Conditions</b>   |             |             |             |             |                |

| <b>Categories</b>             | <b>2016</b> | <b>2018</b> | <b>2020</b> | <b>2022</b> | <b>P value</b> |
|-------------------------------|-------------|-------------|-------------|-------------|----------------|
| Zero                          | 25.3% (51)  | 25.3% (35)  | 33.3% (51)  | 34.2% (62)  |                |
| One                           | 22.6% (45)  | 31.3% (41)  | 27.9% (40)  | 30.2% (53)  |                |
| Two or More                   | 48.2% (125) | 40.6% (80)  | 34.1% (74)  | 30.9% (68)  |                |
| Missing                       | 3.9% (12)   | 2.8% (7)    | 4.7% (13)   | 4.6% (11)   | 0.02           |
| <b>Functional Disability</b>  |             |             |             |             |                |
| Yes                           | 54.9% (140) | 53.0% (96)  | 44.5% (89)  | 45.2% (87)  |                |
| No                            | 45.1% (93)  | 47.0% (67)  | 55.5% (89)  | 53.2% (105) |                |
| Missing                       | 0 (-)       | 0 (-)       | 0 (-)       | 1.6% (2)    | 0.006          |
| <b>CC Screen Eligible</b>     |             |             |             |             |                |
| Yes                           | 63.7% (157) | 63.8% (112) | 66.2% (129) | 61.4% (130) |                |
| <b>BC Screening Eligible</b>  |             |             |             |             |                |
| Yes                           | 16.4% (54)  | 14.6% (41)  | 14.0% (38)  | 9.2% (23)   |                |
| <b>CRC Screening Eligible</b> |             |             |             |             |                |
| Yes                           | 26.3% (83)  | 23.6% (58)  | 20.7% (57)  | 22.6% (61)  |                |

Data from the Behavioral Risk Factor Surveillance Survey 2016, 2018, 2020, and 2022

CC – Cervical Cancer; BC- Breast Cancer; CRC- Colorectal Cancer



*Supplemental Table 4: Health Care Access by Year and Group*

| <b>Group</b>                        | <b>2016</b>         | <b>2018</b>         | <b>2020</b>         | <b>2022</b>         |
|-------------------------------------|---------------------|---------------------|---------------------|---------------------|
| <b>Checkup in Past Year</b>         |                     |                     |                     |                     |
| Medicaid Expansion                  | 46.1% [39.9%-52.4%] | 53.5% [46.2%-60.7%] | 44.9% [38.0%-52.0%] | 40.2% [31.1%-50%]   |
| Traditional Medicaid                | 73.8% [65.3%-80.8%] | 81.6% [72.5%-88.2%] | 82.7% [75.2%-88.3%] | 75.8% [66.6%-83.1%] |
| All NC (18-64)                      | 69.7% [68.0%-71.3%] | 75.3% [73.4%-77.0%] | 74.8% [73.1%-76.4%] | 71.6% [69.5%-73.7%] |
| <b>A Regular Source of Care</b>     |                     |                     |                     |                     |
| Medicaid Expansion                  | 37.0% [31.1%-43.4%] | 33.3% [26.7%-40.6%] | 35.4% [29%-42.4%]   | 36.7% [27.7%-46.8%] |
| Traditional Medicaid                | 82.5% [75.2%-88.0%] | 87.6% [79.2%-92.9%] | 76.0% [66.9%-83.1%] | 73.0% [62.4%-81.5%] |
| All NC (18-64)                      | 74.2% [72.6%-75.7%] | 73.0% [71.1%-74.8%] | 72.2% [70.5%-74.0%] | 77.8% [75.9%-79.7%] |
| <b>Delayed Care due to Cost</b>     |                     |                     |                     |                     |
| Medicaid Expansion                  | 53.7% [47.4%-60.0%] | 52.9% [45.5%-60.1%] | 44.4% [37.3%-51.7%] | 45.7% [36.6%-55.2%] |
| Traditional Medicaid                | 21.4% [15.3%-29.0%] | 25.4% [17.6%-35.1%] | 14.4% [9.6%-21.1%]  | 19.5% [12.6%-29.0%] |
| All NC (18-64)                      | 18.7% [17.4%-20.2%] | 17.3% [15.8%-19.0%] | 13.3% [12.1%-14.7%] | 14.1% [12.5%-15.7%] |
| <b>Any Dental Care in Past Year</b> |                     |                     |                     |                     |
| Medicaid Expansion                  | 30.0% [24.8%-35.8%] | 36.2% [29.3%-43.7%] | 34.2% [27.9%-41.2%] | 27.5% [19.3%-37.5%] |
| Traditional Medicaid                | 55.6% [47.7%-63.3%] | 48.5% [39.1%-58.0%] | 55.6% [46.0%-64.9%] | 57.5% [47.6%-66.8%] |
| All NC (18-64)                      | 63.3% [61.5%-65.0%] | 65.5% [63.4%-67.5%] | 64.9% [63.0%-66.7%] | 62.5% [60.3%-64.7%] |
| <b>Flu Shot in Past Year</b>        |                     |                     |                     |                     |
| Medicaid Expansion                  | 22.6% [17.9%-28.1%] | 24.3% [18.3%-31.5%] | 17.1% [12.8%-22.5%] | 27.9% [19.2%-38.6%] |
| Traditional Medicaid                | 35.7% [28.4%-43.6%] | 26.3% [19.2%-34.9%] | 31.0% [22.8%-40.4%] | 28.4% [20.2%-38.3%] |
| All NC (18-64)                      | 38.8% [37.1%-40.6%] | 35.1% [33.1%-37.2%] | 42.7% [40.8%-44.6%] | 38.7% [36.5%-40.9%] |

Data from the Behavioral Risk Factor Surveillance Survey 2016, 2018, 2020, and 2022.
